# Supplementary material
Source: MDPI journal article supplement (https://www.mdpi.com/1999-4907/13/10/1701)
Supplement: s1 [file s1]

## Supplementary Tables S1 and Tables S2

**Table S1.** Basic information of soil C-, N- and P-acquiring enzymes substrate.

| Enzyme type        | Extracellular enzyme                       | EC       | function                                    | Substrate (concentration)                              |
|--------------------|--------------------------------------------|----------|---------------------------------------------|--------------------------------------------------------|
| C-acquiring enzyme | $\beta$ -1,4-glucosidase (BG)              | 3.2.1.21 | Cellulose degradation                       | 4-MUB- $\beta$ -D-glucoside (200 $\mu$ M)              |
|                    | $\beta$ -D-Cellobiosidase (CB)             | 3.2.1.91 | Cellulose degradation                       | 4-MUB- $\beta$ -D-cellobioside (200 $\mu$ M)           |
|                    | $\beta$ -1,4-xylosidasev (XYL)             | 3.2.1.37 | Xylan degradation                           | 4-MUB- $\beta$ -D-xylopyranoside (200 $\mu$ M)         |
| N-acquiring enzyme | $\beta$ -1,4-N-acetylglucosaminidase (NAG) | 3.2.1.52 | Chitin and peptidoglycan degradation        | 4-MUB-N-acetyl- $\beta$ -D-glucosaminide (200 $\mu$ M) |
|                    | L-leucine aminopeptidase (LAP)             | 3.4.11.1 | Hydrolyzed protein                          | L-Leucine-7-amino-4-methylcoumarin (200 $\mu$ M)       |
| P-acquiring enzyme | Alkaline phosphatase (ALP)                 | 3.1.3.1  | Catalytic decomposition of organophosphates | 4-MUB-phosphate (100 $\mu$ M)                          |

EC, Enzyme Commission number describing enzymatic function in increasing level of detail (the first number distinguishes 1-oxidoreductases, 2-transferases, 3- hydrolases, 4-lyases, 5-isomerases, and 6-ligases).

**Table S2.** Characteristics of soils from different treatments: results for aggregate fractions (mean  $\pm$  standard error, n=5).

| Item                                    | Treatment | Aggregate size       |                      |                     |                      |
|-----------------------------------------|-----------|----------------------|----------------------|---------------------|----------------------|
|                                         |           | >2mm                 | 1-2mm                | 0.25-1mm            | <0.25mm              |
| Aggregate distribution (%)              | CK        | 81.72 $\pm$ 5.24 a   | 8.91 $\pm$ 1.02 a    | 8.17 $\pm$ 0.94 a   | 1.20 $\pm$ 0.30a     |
|                                         | PD        | 83.03 $\pm$ 3.47a    | 8.08 $\pm$ 0.92a     | 7.84 $\pm$ 0.85a    | 1.05 $\pm$ 0.27a     |
|                                         | PA        | 85.64 $\pm$ 3.60a    | 7.20 $\pm$ 1.07 a    | 6.11 $\pm$ 1.30 ab  | 1.05 $\pm$ 0.13 a    |
|                                         | MP        | 90.22 $\pm$ 2.08 a   | 4.36 $\pm$ 0.44 b    | 4.79 $\pm$ 0.87 b   | 0.62 $\pm$ 0.10 b    |
| SOM (g/kg)                              | CK        | 43.10 $\pm$ 2.63 b   | 43.26 $\pm$ 1.59 b   | 39.91 $\pm$ 2.05 b  | 40.46 $\pm$ 2.63 b   |
|                                         | PD        | 55.27 $\pm$ 2.21 a   | 52.52 $\pm$ 2.38 a   | 52.17 $\pm$ 3.91 a  | 67.50 $\pm$ 7.58 a   |
|                                         | PA        | 63.11 $\pm$ 5.63 a   | 51.67 $\pm$ 1.84 a   | 50.31 $\pm$ 1.76 a  | 60.15 $\pm$ 6.71 a   |
|                                         | MP        | 61.59 $\pm$ 1.96 a   | 55.19 $\pm$ 3.39 a   | 52.47 $\pm$ 2.83 a  | 67.99 $\pm$ 6.51 a   |
| TN (g/kg)                               | CK        | 4.14 $\pm$ 0.36 a    | 4.60 $\pm$ 0.60 a    | 4.64 $\pm$ 0.54 a   | 5.73 $\pm$ 0.38 a    |
|                                         | PD        | 3.24 $\pm$ 0.34 a    | 3.82 $\pm$ 0.49 a    | 3.29 $\pm$ 0.10 b   | 6.05 $\pm$ 0.68 a    |
|                                         | PA        | 3.15 $\pm$ 0.39 a    | 3.33 $\pm$ 0.35 a    | 3.10 $\pm$ 0.31 b   | 5.59 $\pm$ 0.64 a    |
|                                         | MP        | 3.53 $\pm$ 0.41 a    | 3.45 $\pm$ 0.36 a    | 3.33 $\pm$ 0.38 b   | 5.09 $\pm$ 0.70 a    |
| TP (g/kg)                               | CK        | 0.24 $\pm$ 0.04 a    | 0.24 $\pm$ 0.06 a    | 0.28 $\pm$ 0.07 b   | 0.23 $\pm$ 0.02 c    |
|                                         | PD        | 0.24 $\pm$ 0.20 a    | 0.27 $\pm$ 0.08 a    | 0.28 $\pm$ 0.02 b   | 0.30 $\pm$ 0.08 b    |
|                                         | PA        | 0.27 $\pm$ 0.07 a    | 0.25 $\pm$ 0.06 a    | 0.33 $\pm$ 0.07 a   | 0.38 $\pm$ 0.06 a    |
|                                         | MP        | 0.27 $\pm$ 0.08 a    | 0.30 $\pm$ 0.14 a    | 0.29 $\pm$ 0.06 b   | 0.25 $\pm$ 0.03 c    |
| NO <sub>3</sub> <sup>-</sup> -N (mg/kg) | CK        | 21.52 $\pm$ 3.22 b   | 22.29 $\pm$ 3.61 b   | 22.74 $\pm$ 3.61 b  | 22.16 $\pm$ 2.45 b   |
|                                         | PD        | 21.06 $\pm$ 1.09 b   | 23.94 $\pm$ 3.05 b   | 22.78 $\pm$ 1.12 b  | 28.44 $\pm$ 3.00 ab  |
|                                         | PA        | 24.99 $\pm$ 1.94 ab  | 25.45 $\pm$ 3.72 ab  | 26.19 $\pm$ 3.95 ab | 29.75 $\pm$ 4.04 ab  |
|                                         | MP        | 29.53 $\pm$ 2.74 a   | 29.90 $\pm$ 5.05 a   | 31.92 $\pm$ 3.57 a  | 36.33 $\pm$ 5.59 a   |
| AP (mg/kg)                              | CK        | 6.50 $\pm$ 1.40 c    | 7.84 $\pm$ 0.57 c    | 6.29 $\pm$ 0.53 c   | 11.63 $\pm$ 0.81 c   |
|                                         | PD        | 6.76 $\pm$ 0.64 c    | 8.65 $\pm$ 0.93 c    | 8.25 $\pm$ 0.88 b   | 13.59 $\pm$ 1.77 bc  |
|                                         | PA        | 10.57 $\pm$ 0.75 b   | 10.97 $\pm$ 1.04 b   | 9.27 $\pm$ 1.05 b   | 16.19 $\pm$ 1.55 ab  |
|                                         | MP        | 17.64 $\pm$ 0.79 a   | 13.27 $\pm$ 0.92 a   | 16.24 $\pm$ 1.32 a  | 18.11 $\pm$ 1.34 a   |
| MBC (mg/kg)                             | CK        | 99.05 $\pm$ 10.82 b  | 103.57 $\pm$ 6.52 c  | 149.65 $\pm$ 7.93 c | 152.54 $\pm$ 7.11 c  |
|                                         | PD        | 108.68 $\pm$ 9.26b   | 104.83 $\pm$ 7.78 c  | 150.61 $\pm$ 6.67 c | 158.99 $\pm$ 8.96 c  |
|                                         | PA        | 146.10 $\pm$ 8.00 a  | 151.58 $\pm$ 8.30 b  | 181.88 $\pm$ 5.63 b | 214.78 $\pm$ 6.89 b  |
|                                         | MP        | 150.91 $\pm$ 12.37 a | 216.41 $\pm$ 14.23 a | 212.85 $\pm$ 9.04 a | 250.86 $\pm$ 12.30 a |
| MBN (mg/kg)                             | CK        | 19.44 $\pm$ 1.05 b   | 13.47 $\pm$ 0.78 b   | 25.62 $\pm$ 3.07 b  | 23.82 $\pm$ 1.61 a   |
|                                         | PD        | 21.80 $\pm$ 2.17 b   | 14.04 $\pm$ 1.38 b   | 28.67 $\pm$ 2.74 b  | 25.81 $\pm$ 3.15 a   |
|                                         | PA        | 24.72 $\pm$ 2.84 ab  | 15.29 $\pm$ 1.02 ab  | 35.70 $\pm$ 3.56 a  | 26.27 $\pm$ 2.71 a   |
|                                         | MP        | 29.66 $\pm$ 0.89 a   | 20.63 $\pm$ 1.00 a   | 37.25 $\pm$ 2.33 a  | 27.73 $\pm$ 3.33 a   |
| MBP (mg/kg)                             | CK        | 14.47 $\pm$ 1.03 b   | 17.57 $\pm$ 1.60 b   | 14.45 $\pm$ 1.19 b  | 19.45 $\pm$ 2.59 a   |
|                                         | PD        | 14.12 $\pm$ 0.56 b   | 16.59 $\pm$ 1.93 b   | 15.74 $\pm$ 1.21b   | 20.95 $\pm$ 1.30 a   |
|                                         | PA        | 16.89 $\pm$ 1.03 ab  | 19.12 $\pm$ 2.78 ab  | 19.03 $\pm$ 0.64 a  | 20.41 $\pm$ 2.55 a   |
|                                         | MP        | 18.93 $\pm$ 0.81 a   | 23.50 $\pm$ 2.80 a   | 19.32 $\pm$ 1.19 a  | 19.36 $\pm$ 1.39 a   |

CK, no-tree control; PD, pure plantation of *Dalbergia odorifera*; PA, pure plantation of *Acrocarpus*

*fraxinifolius*; MP, mixed plantation of *Acrocarpus fraxinifolius* and *Dalbergia odorifera*; SOM, soil organic matter; TN, total nitrogen; C:N, soil carbon to nitrogen ratio; TP, total phosphorus; C:P, soil carbon to phosphorus ratio; N:P, soil nitrogen to phosphorus ratio;  $\text{NH}_4^+$ -N, ammonium nitrogen;  $\text{NO}_3^-$ -N, nitrate nitrogen; AP, available phosphorus. MBC, microbial biomass carbon; MBN, microbial biomass nitrogen; MBP, microbial biomass phosphorus. Different lowercase letters within the same column indicate significant differences ( $P < 0.05$ ) among treatments.
